# Supplementary material
Source: publisher figshare collection journal article supplement (https://acs.figshare.com/ndownloader/files/32673192)
Supplement: Supplementary file 1 [file 32673192]

## SUPPORTING INFORMATION

# Cross-linking Poly(caprolactone)–Polyamidoamine Linear Dendritic Block Copolymers for Theranostic Nanomedicine

*Indika Chandrasiri,<sup>1</sup> Mahesh Loku Yaddehige,<sup>1</sup> Bo Li,<sup>4</sup> Yuzhe Sun,<sup>3</sup> William E. Meador,<sup>1</sup> Austin Dorris,<sup>1</sup> Mohammad Farid Zia,<sup>2</sup> Nathan I. Hammer,<sup>1</sup> Alex Flynt,<sup>2</sup> Jared H. Delcamp,<sup>1</sup> Edward Davis,<sup>3</sup> Alexander Lippert,<sup>4</sup> and Davita L. Watkins<sup>1\*</sup>*

<sup>1</sup> Department of Chemistry and Biochemistry, University of Mississippi, University, Mississippi 38677, USA; corresponding author email: [dwatkins@olemiss.edu](mailto:dwatkins@olemiss.edu)\*

<sup>2</sup> Department of Biological Sciences, The University of Southern Mississippi, Hattiesburg, Mississippi 39406, USA

<sup>3</sup> Department of Mechanical Engineering, Auburn University, Auburn, Alabama 36849, USA

<sup>4</sup> Department of Chemistry, Southern Methodist University, Dallas, Texas 75205, USA

## TABLE OF CONTENTS

|                                                        |            |
|--------------------------------------------------------|------------|
| <b>SYNTHESIS.....</b>                                  | <b>S3</b>  |
| <b>NMR SPECTRA .....</b>                               | <b>S7</b>  |
| <b>GPC ANALYSIS.....</b>                               | <b>S10</b> |
| <b>THERMAL ANALYSIS .....</b>                          | <b>S11</b> |
| <b>TGA.....</b>                                        | <b>S11</b> |
| <b>DSC .....</b>                                       | <b>S15</b> |
| <b>CRITICAL AGGREGATION CONCENTRATION (CAC) .....</b>  | <b>S16</b> |
| <b>DYNAMIC LIGHT SCATTERING (DLS) and TEM .....</b>    | <b>S17</b> |
| <b>ENCAPSULATION STUDIES.....</b>                      | <b>S20</b> |
| <b>EMISSION SPECTRA.....</b>                           | <b>S20</b> |
| <b>ABSORPTION SPECTRA OVER TIME AND LIFETIME .....</b> | <b>S21</b> |
| <b>PHOTOTHERMAL DATA .....</b>                         | <b>S23</b> |
| <b>STORAGE STABILITY .....</b>                         | <b>S24</b> |
| <b>IN VITRO PHOTOTHERMAL EXPERIMENTS .....</b>         | <b>S24</b> |
| <b>REFERENCES .....</b>                                | <b>S25</b> |

## SYNTHESIS

### 70-PCL-G3 Structure

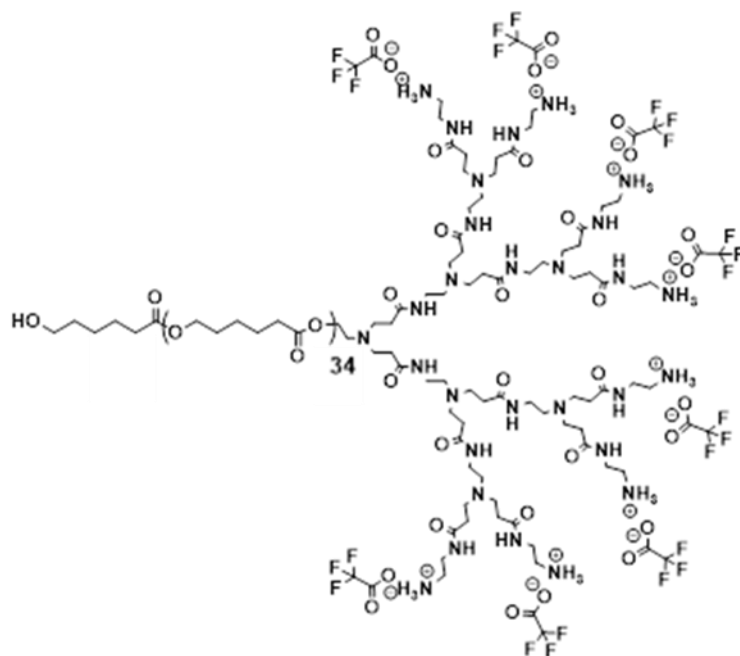

**Figure S1.** Structure of 70-PCL-G3 LDBC, consists of 70 wt% hydrophobic (PCL) and 30 wt% hydrophilic (PAMAM). <sup>1</sup> n = 34

The synthesis of 70-PCL-G3 is reported in our previous work. <sup>1</sup>

## Ph- $\epsilon$ CL Synthesis

**Scheme S1.** Synthesis of Ph- $\epsilon$ CL<sup>2</sup>

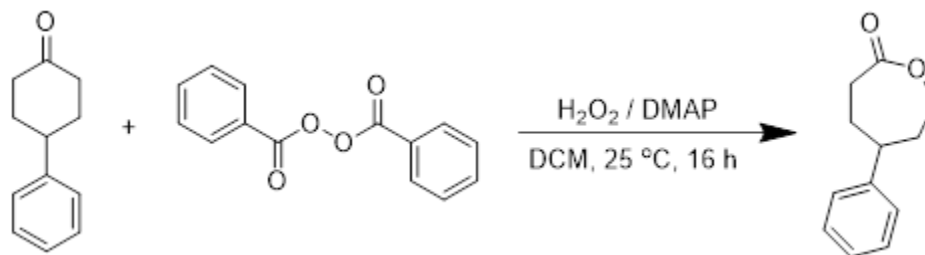

Phenyl substituted  $\epsilon$ -caprolactone was synthesized via Baeyer–Villiger oxidation of 4-phenylcyclohexanone.<sup>33</sup> (The synthesis was done according to the procedure described in the general synthesis section of the main text.)  $^1\text{H}$  NMR (400 MHz, Chloroform- $d$ )  $\delta$  7.37 – 7.15 (CH(Ph)-, m, 5H), 4.44 – 4.26 (-CH<sub>2</sub>-O-, m, 2H), 2.91 – 2.70 (-CH<sub>2</sub>-COO-, Ph-CH-(CH<sub>2</sub>)<sub>2</sub>-, m, 3H), 2.20 – 1.77 (-CH<sub>2</sub>-CH<sub>2</sub>-O-, -CH<sub>2</sub>-CH<sub>2</sub>-COO-, m, 4H).

### 5-PhPCL-G3

A mixture of PAMAM–G3–Boc (1) (1.0 g, 0.40 mmol), PhPCL (91.6 mg, 0.48 mmol) and  $\epsilon$ -caprolactone (1.53 g, 13.4 mmol) in a mixture of chlorobenzene (15 ml) was heated to 90 °C. Tin(II) 2-ethylhexanoate (  $\text{Sn}(\text{Oct})_2$ ) (98.74 mg, 0.24 mmol) was then added under an ultra-high pure nitrogen environment, and the mixture was heated to 130 °C. The mixture was stirred at 130 °C for 10 h. The reaction mixture was allowed to cool down to room temperature, added dropwise into 250 ml of diethyl ether ( $\text{Et}_2\text{O}$ ) while stirring. A precipitate was formed and settled down to the bottom of the flask after stirring stopped. The mixture was vacuum filtered and solid was separated. The resulting pale-yellow solid was redissolved in chloroform (5 ml) and added dropwise into 250 ml of  $\text{Et}_2\text{O}$ , similar to the previous step. The precipitation steps were repeated three times to get a

pure product. The resulting yellow solid was dried under a high vacuum at room temperature for 24 hours to obtain the pure and dried product with an 85.2 % yield (2.08 g).

### 10-PhPCL-G3

A mixture of PAMAM-G3-Boc (1) (1.0 g, 0.40 mmol), PhPCL (160 mg, 0.84 mmol) and  $\epsilon$ -caprolactone (1.42 g, 12.5 mmol) in a mixture of chlorobenzene (15 ml) was heated to 90 °C. Tin(II) 2-ethylhexanoate (  $\text{Sn}(\text{Oct})_2$ ) (98.82 mg, 0.24 mmol) was then added under an ultra-high pure nitrogen environment, and the mixture was heated to 130 °C. The mixture was stirred at 130 °C for 10 h. The reaction mixture was allowed to cool down to room temperature, added dropwise into 250 ml of diethyl ether ( $\text{Et}_2\text{O}$ ) while stirring. A precipitate was formed and stuck on the wall of the flask. The mixture was kept stirring until a clear solution is observed (all the precipitate stuck onto the walls), and stirring was stopped. Then  $\text{Et}_2\text{O}$  was decanted from the mixture. The resulting yellow solid was redissolved in chloroform (5 ml) and added dropwise into 250 ml of  $\text{Et}_2\text{O}$ , similar to the previous step. The precipitation steps were repeated three times to get a pure product. The resulting yellow solid was dried under a high vacuum at room temperature for 24 hours to obtain the pure and dried product with an 83 % yield (2.03 g).

### 20-PhPCL-G3

A mixture of PAMAM-G3-Boc (1) (1.0 g, 0.40 mmol), PhPCL (319.4 mg, 1.68 mmol) and  $\epsilon$ -caprolactone (1.28 g, 11.2 mmol) in a mixture of chlorobenzene (15 ml) was heated to 90 °C. Tin(II) 2-ethylhexanoate (  $\text{Sn}(\text{Oct})_2$ ) (98.8 mg, 0.24 mmol) was then added under an ultra-high pure nitrogen environment, and the mixture was heated to 130 °C. The mixture was stirred at 130 °C for 10 h. The reaction mixture was allowed to cool down to room temperature, added

dropwise into 250 ml of diethyl ether (Et<sub>2</sub>O) while stirring. A precipitate was formed and stuck on the wall of the flask. The mixture was kept stirring until a clear solution is observed (all the precipitate stuck onto the walls), and stirring was stopped. Then Et<sub>2</sub>O was decanted from the mixture. The resulting dark yellow sticky solid was redissolved in chloroform (5 ml) and added dropwise into 250 ml of Et<sub>2</sub>O, similar to the previous step. The precipitation steps were repeated three times. As this reaction was not propagated to 100% conversion, the percentage yield was not calculated.

**Table S1.** Theoretical composition wt % of each block concerning the LDBC and wt% of each PCL type (i.e., PhPCL or PCL) concerning the hydrophobic block.<sup>a</sup>

|             | wt% of the hydrophilic block (PAMAM-G3) | wt% of the hydrophobic block (PCL + PhPCL) | PCL and PhPCL wt% concerning hydrophobic block weight |         |
|-------------|-----------------------------------------|--------------------------------------------|-------------------------------------------------------|---------|
|             |                                         |                                            | PhPCL wt%                                             | PCL wt% |
| 5-PhPCL-G3  | 30                                      | 70                                         | 5                                                     | 95      |
| 10-PhPCL-G3 | 30                                      | 70                                         | 10                                                    | 90      |
| 20-PhPCL-G3 | 30                                      | 70                                         | 20                                                    | 80      |

<sup>a</sup> Actual composition qualitatively determined via spectroscopy and thermal analysis (Tables S2 and 3)

## NMR SPECTRA

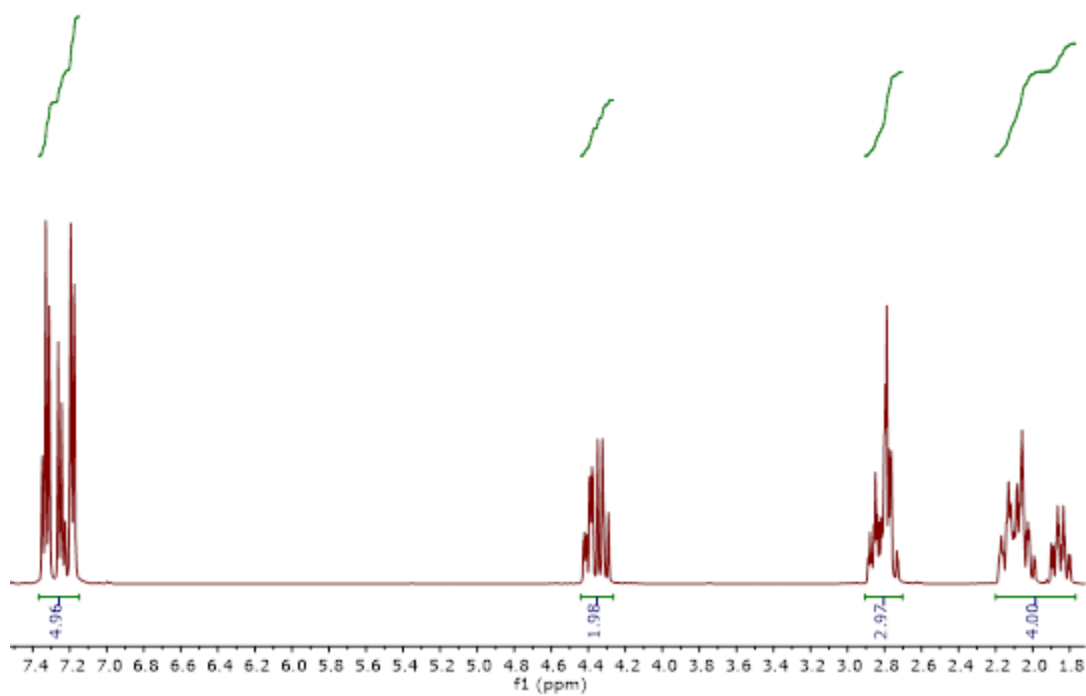

**Figure S2.**  $^1\text{H}$  NMR for Ph- $\epsilon$ CL (400 MHz, Chloroform- $d$ )  $\delta$  7.37 – 7.15 (m, 5H), 4.44 – 4.26 (m, 2H), 2.91 – 2.70 (m, 3H), 2.20 – 1.77 (m, 4H).

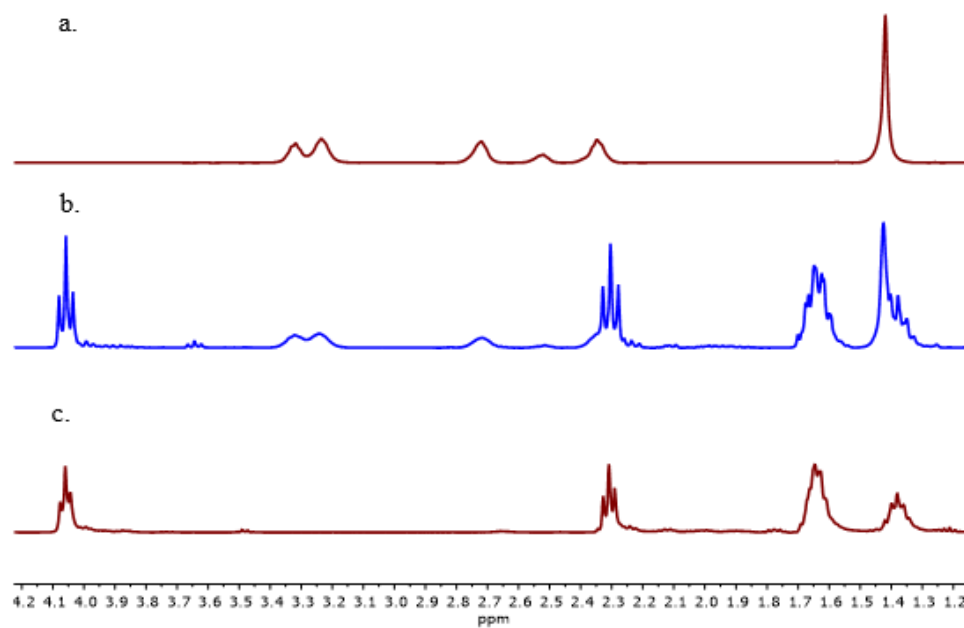

**Figure S3.**  $^1\text{H}$  NMR overlay of the (a) macroinitiator (PAMAM-G3-Boc), (b) LDBC intermediate (10-PhPCL-G3Boc), and (c) LDBC after Boc deprotection (10-PhPCL-G3) in  $\text{CDCl}_3$ .

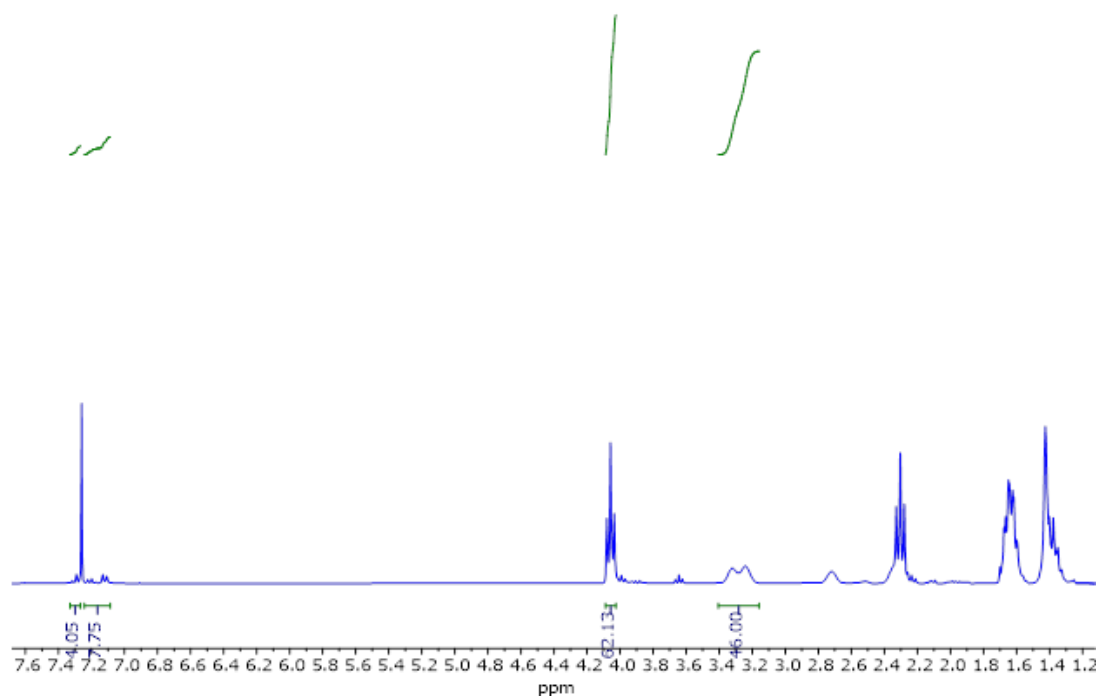

**Figure S4.**  $^1\text{H}$  NMR for 10-PhPCL-G3Boc in  $\text{CDCl}_3$



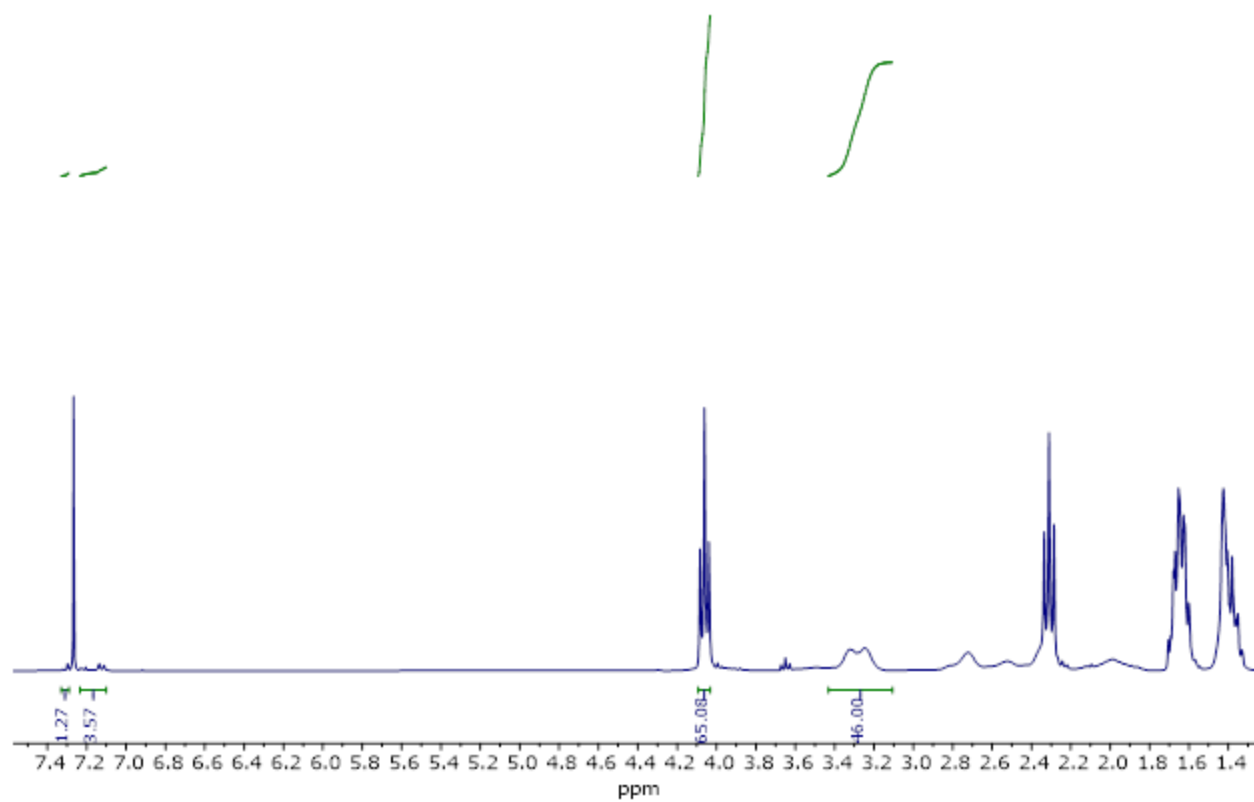

**Figure S5.**  $^1\text{H}$  NMR for 5-PhPCL-G3Boc in  $\text{CDCl}_3$

## GPC ANALYSIS

**Table S2.** Molecular weight analysis of LDBC by NMR spectroscopy and GPC.

|                | $M_{th}$ | $DP_{th}$ | $nPhPCL_{th}$ | $M_n$<br>NMR | $DP$<br>NMR | $nPhPCL$<br>NMR | %Ph | $M_n$ | $M_w$ | $\bar{D}$ |
|----------------|----------|-----------|---------------|--------------|-------------|-----------------|-----|-------|-------|-----------|
| 5-PhPCL-G3Boc  | 6350     | 34        | 1             | 6247         | 33          | 1               | 5.4 | 6143  | 7676  | 1.25      |
| 10-PhPCL-G3Boc | 6350     | 34        | 2             | 6386         | 34          | 2               | 9.6 | 5280  | 6929  | 1.31      |

The notation of PhPCL-G3 denotes the LDBC composition, where phenyl substituted PCL connected to a G3 PAMAM with a weight percentage is in respect to the caprolactone monomer used;  $M_{th}$ , theoretical molar mass;  $DP_{th}$ , theoretical degree of polymerization;  $M_n$ , number average molar mass;  $M_w$ , weight-average molar mass; and  $\bar{D}$ , dispersity.

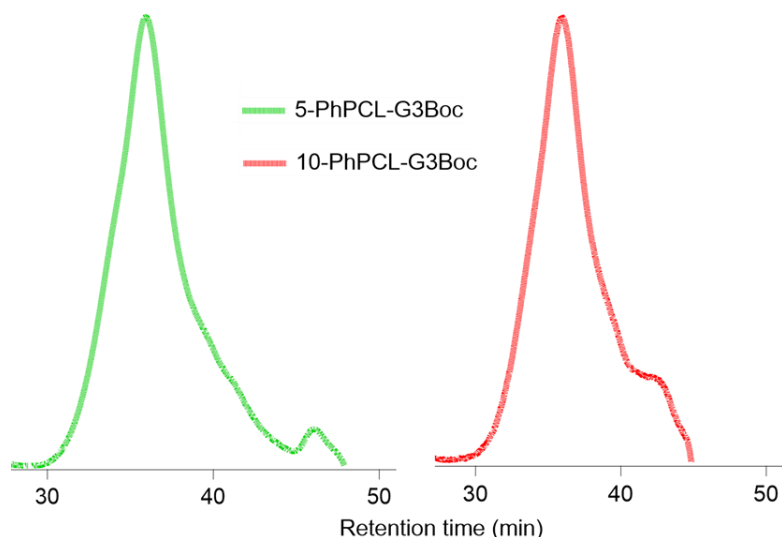

**Figure S6.** GPC chromatograms of PhPCL-G3Boc LDBC precursors.

## THERMAL ANALYSIS

**Table S3.** Predicted and Experimental Thermal Analysis Data (TGA) Confirming the Weight Ratios for Each LDBC.

| System      | Composition |             |                                        | 1 <sup>st</sup> step |          | 2 <sup>nd</sup> step |          | 3 <sup>rd</sup> step |          |
|-------------|-------------|-------------|----------------------------------------|----------------------|----------|----------------------|----------|----------------------|----------|
|             | PAMAM       | PCL + PhPCL | Ph substituents (wrt total molar mass) | T <sub>d</sub> (°C)  | ΔW (wt%) | T <sub>d</sub> (°C)  | ΔW (wt%) | T <sub>d</sub> (°C)  | ΔW (wt%) |
| 10-PhPCL-G3 | 30          | 70          | 7                                      | 226                  | 32.5     | 321                  | 67.5     | 422                  | 8        |
| 5-PhPCL-G3  | 30          | 70          | 3.5                                    | 220                  | 33       | 314                  | 67       | 410                  | NA       |

## TGA

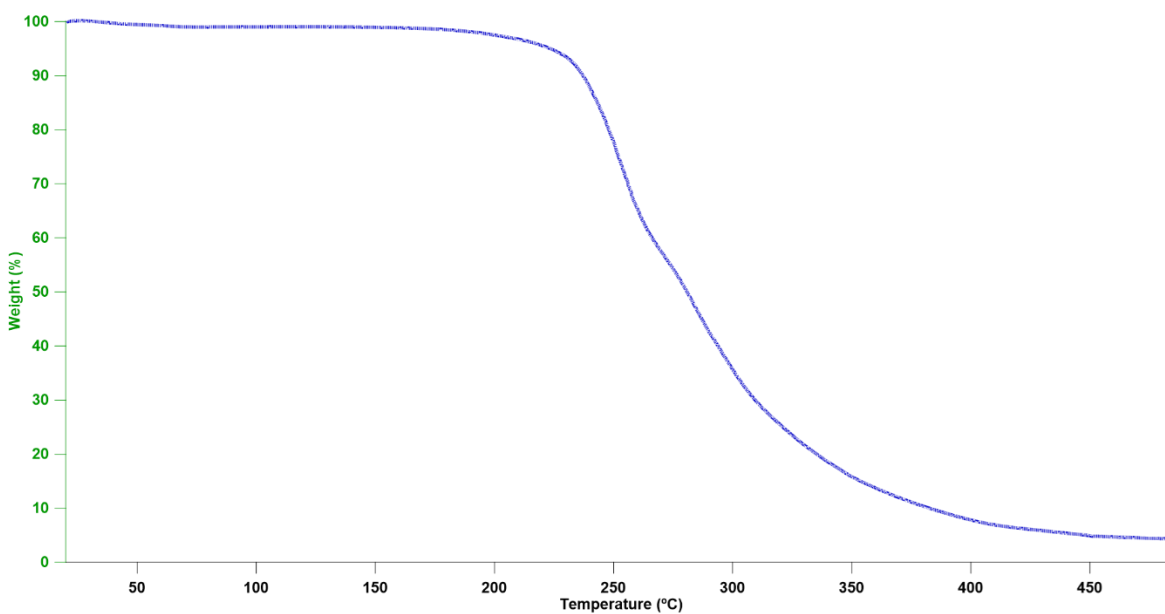

**Figure S7.** TGA of PAMAM-G3Boc; 95 % decomposition at 223.4°C

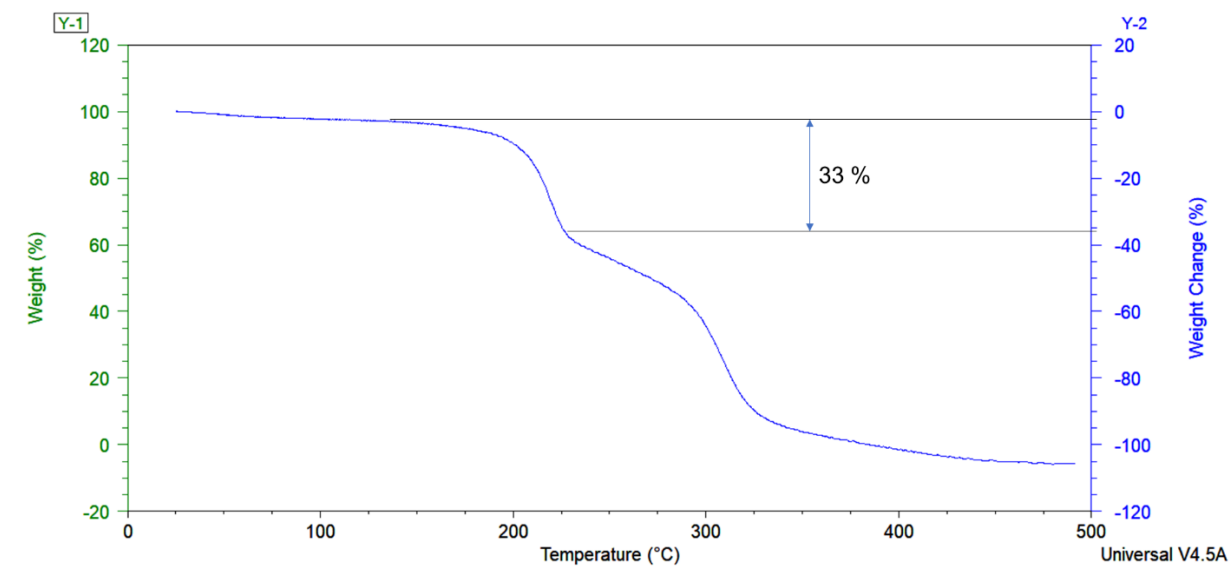

**Figure S8.** TGA of 5-PhPCL-G3

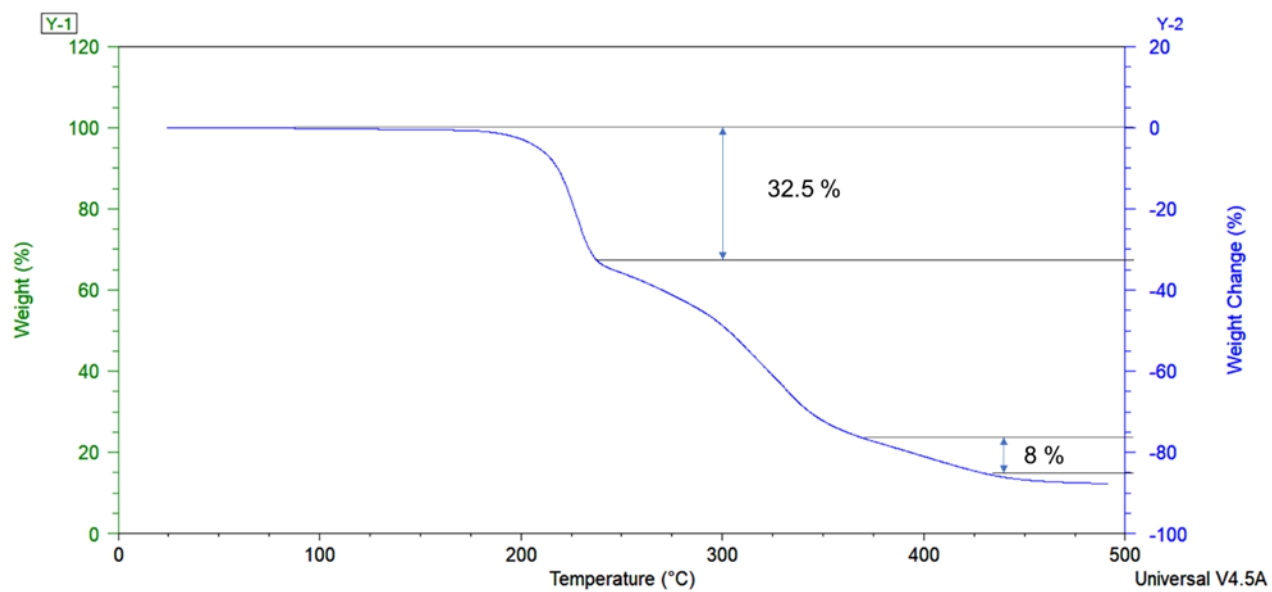

**Figure S9.** TGA of 10-PhPCL-G3.

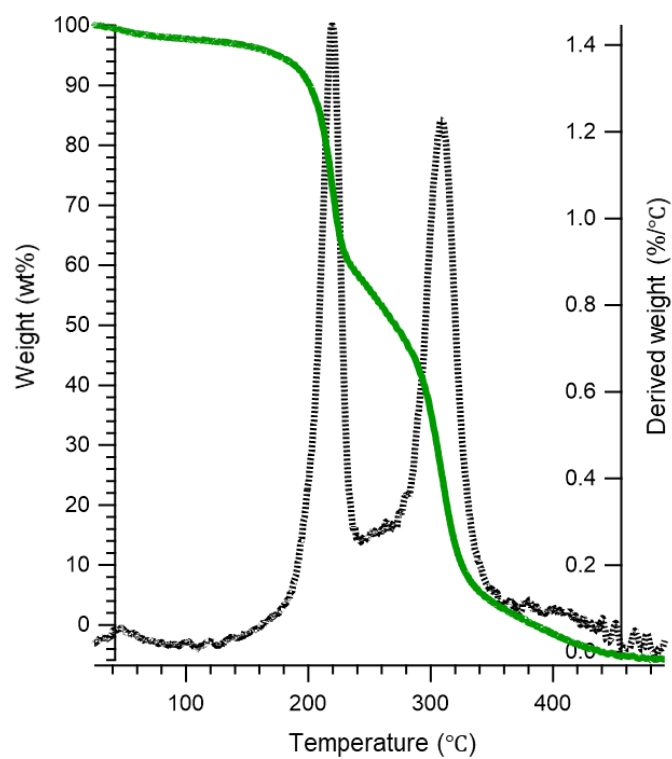

**Figure S10.** TGA and derived TG analysis of 5-PhPCL-G3. TGA (green) and derivative thermogravimetry (DTG) (black)

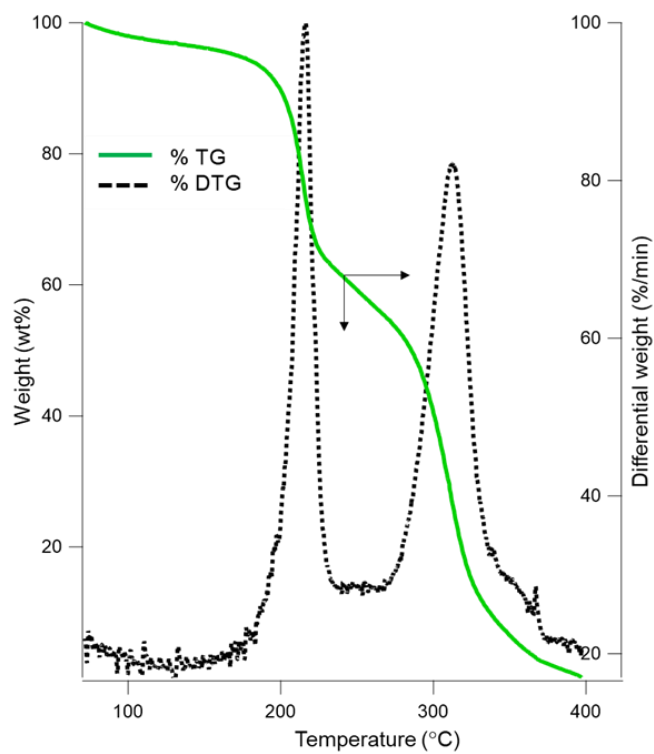

**Figure S11.** TGA and derived TG analysis of PCL-G3 (70-PCL-G3). TGA (green) and derivative thermogravimetry (DTG) (black)<sup>1</sup>

## DSC

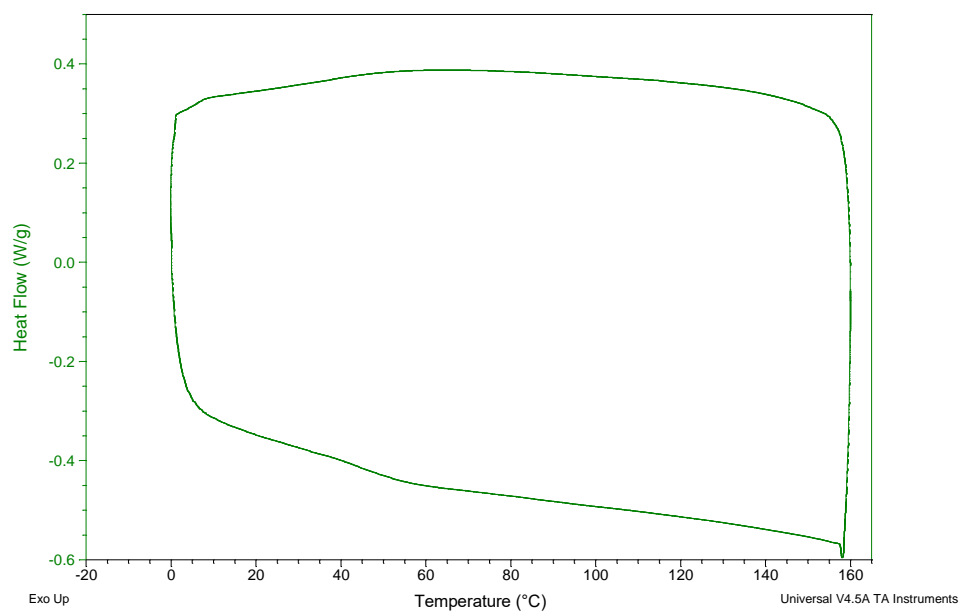

**Figure S12.** DSC thermogram for 5-PhPCL-G3; 3<sup>rd</sup> and 4<sup>th</sup> cycle

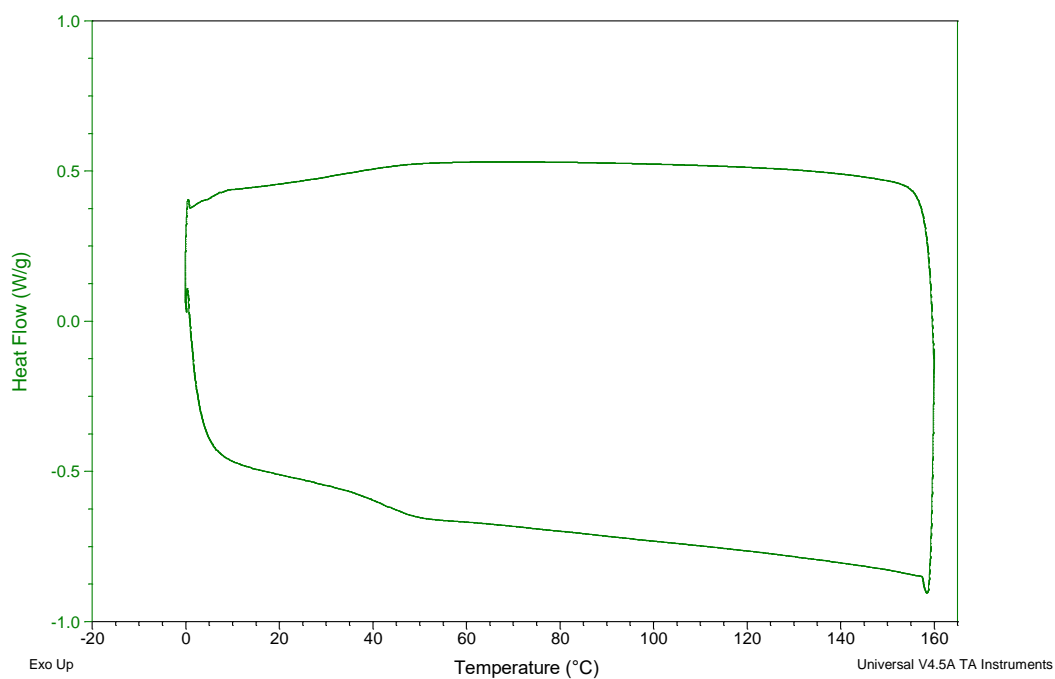

**Figure S13.** DSC thermogram for 10-PhPCL-G3; 3<sup>rd</sup> and 4<sup>th</sup> cycle

## CRITICAL AGGREGATION CONCENTRATION (CAC)

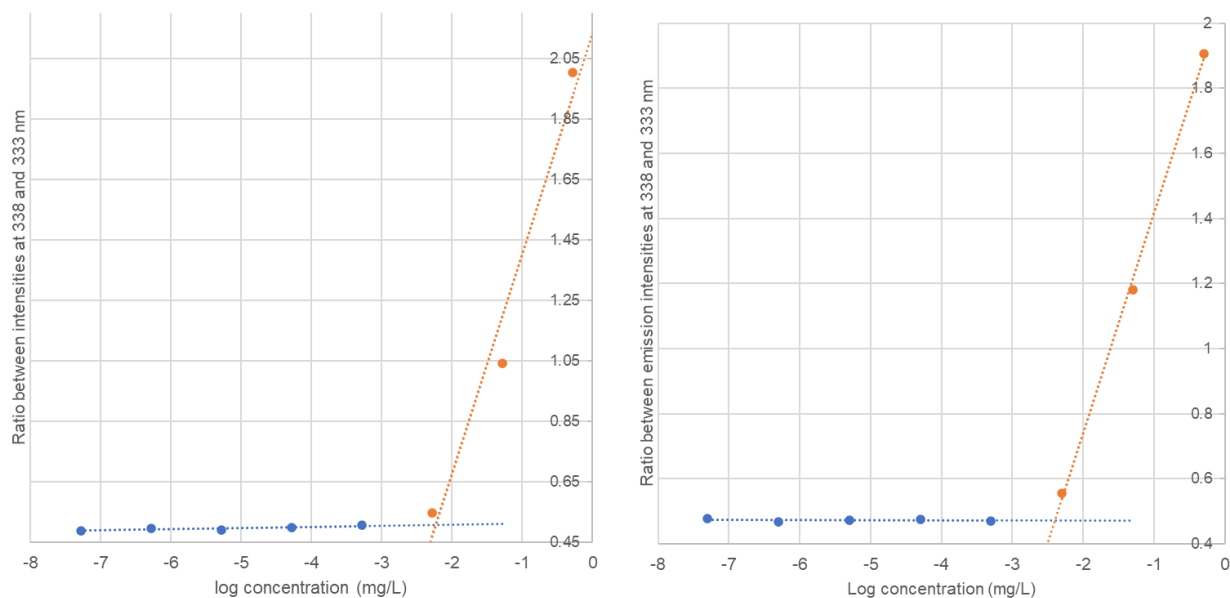

**Figure S14.** CAC plots of 5-PhPCL-G3 (left) 10-PhPCL-G3 (right). ( Y axis - ratio of emission intensities at 338 and 333 nm)



## DYNAMIC LIGHT SCATTERING (DLS) and TEM

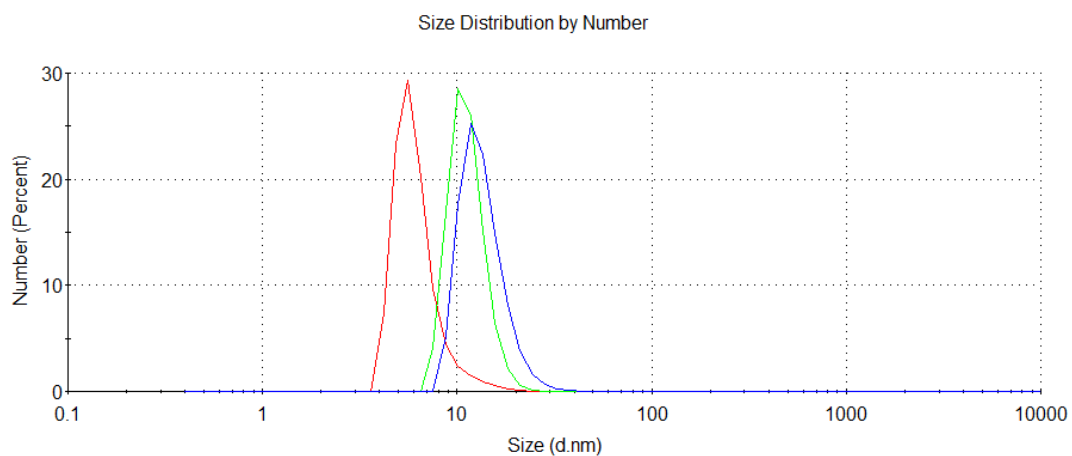

**Figure S15.** Number average size distributions for 5-PhPCL-G3.

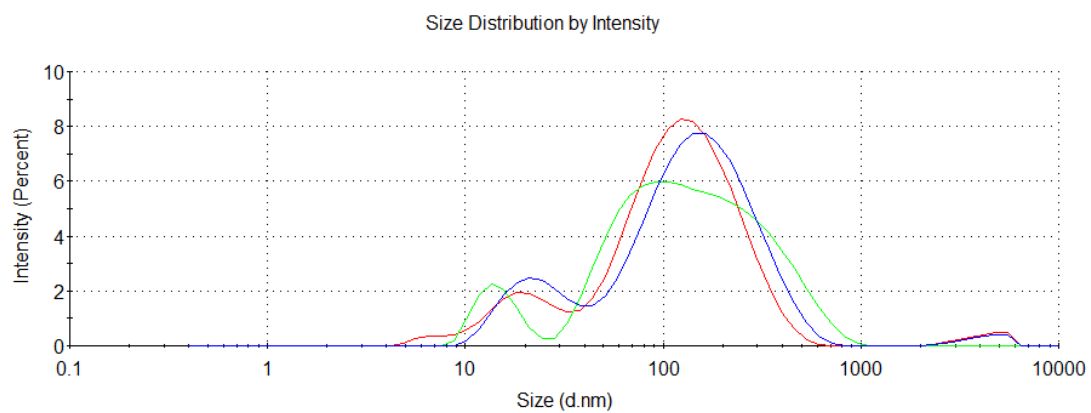

**Figure S16.** Intensity average size distributions for 5-PhPCL-G3.

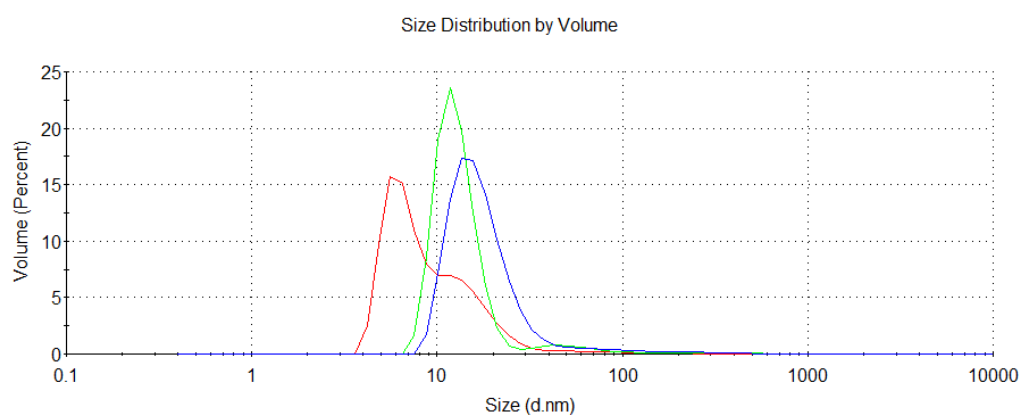

**Figure S17.** Volume average size distributions for 5-PhPCL-G3.

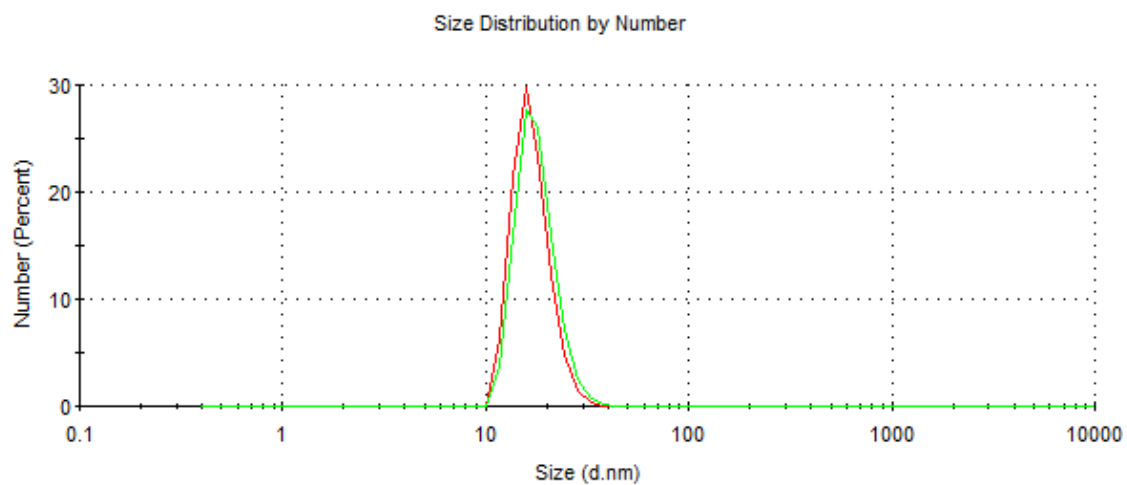

**Figure S18.** Number average size distributions for 10-PhPCL-G3.

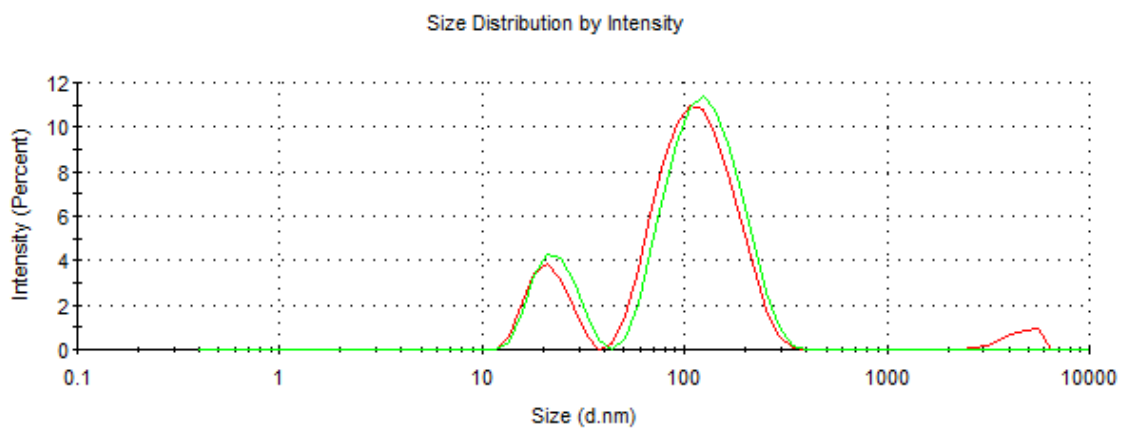

**Figure S19.** Intensity average size distributions for 10-PhPCL-G3.

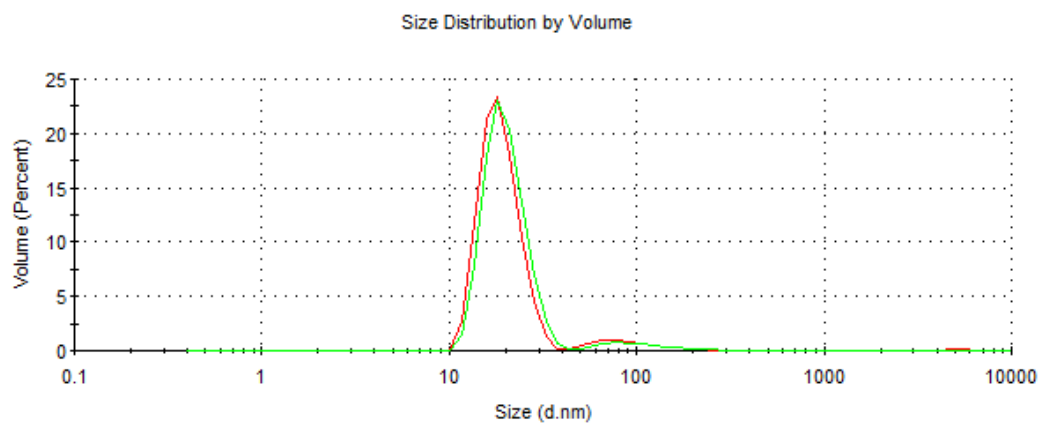

**Figure S20.** Volume average size distributions for 10-PhPCL-G3.

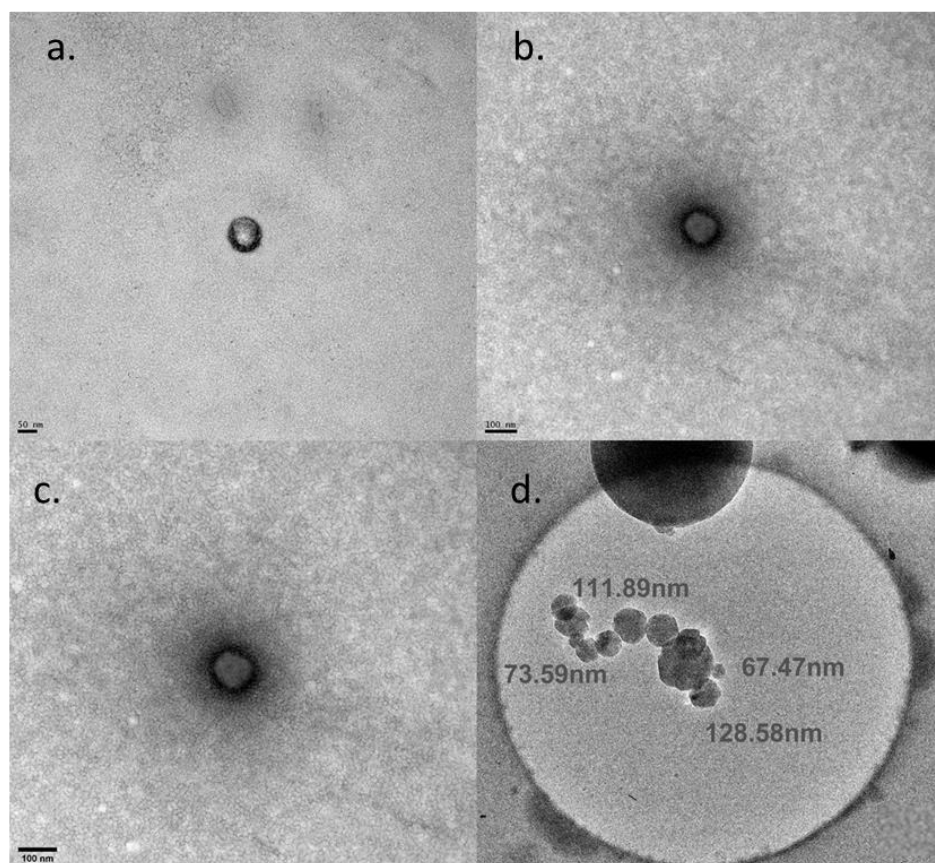

**Figure S21.** Additional TEM images that show evidence of bilayer vesicles and size distributions observed from DLS. Standard TEM (a-c) and cryo-TEM (d).

## ENCAPSULATION STUDIES

**Table S4.** DL % comparison between phenyl substituted and non-substituted LDBCs formed via conventional nanoprecipitation.

|                    | Encapsulation efficiency (DL %) |      |      |
|--------------------|---------------------------------|------|------|
|                    | Curcumin                        | C3   | C5   |
| <b>70-PCL-G3</b>   | 13.70                           | 1.70 | 2.58 |
| <b>5-PhPCL-G3</b>  | 13.73                           | 1.94 | 2.88 |
| <b>10-PhPCL-G3</b> | 17.50                           | 2.40 | 3.41 |

## EMISSION SPECTRA

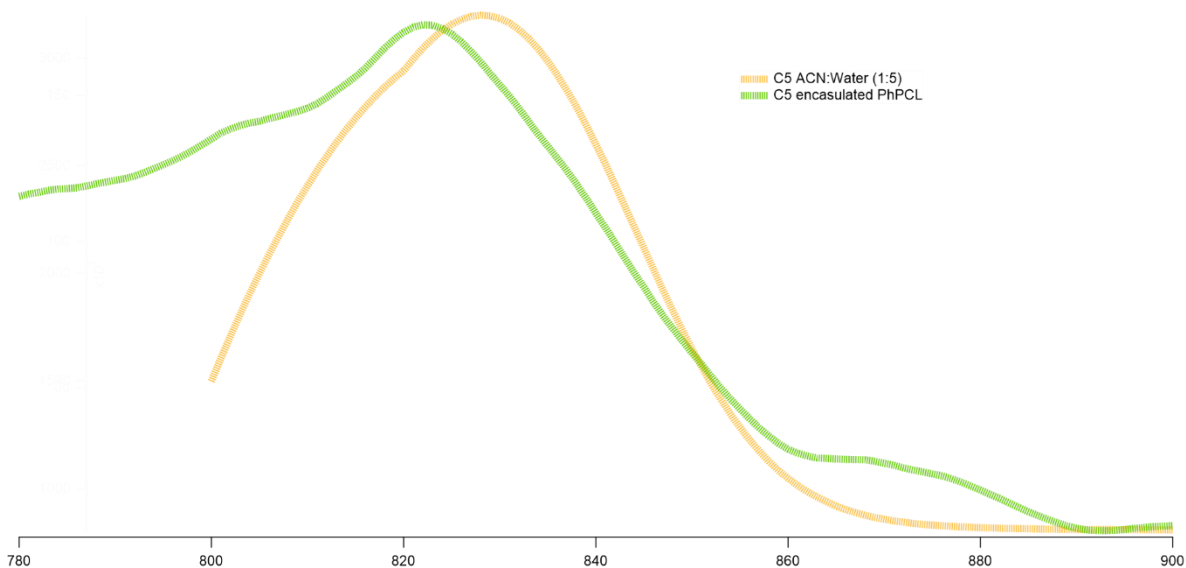

**Figure S22.** Emission spectra for free C5 in the solution and encapsulated in 10-PhPCL-G3 nanoparticles. Excitation wavelengths are 700 nm and 810 nm.

## ABSORPTION SPECTRA AT DIFFERENT TIME INTERVALS

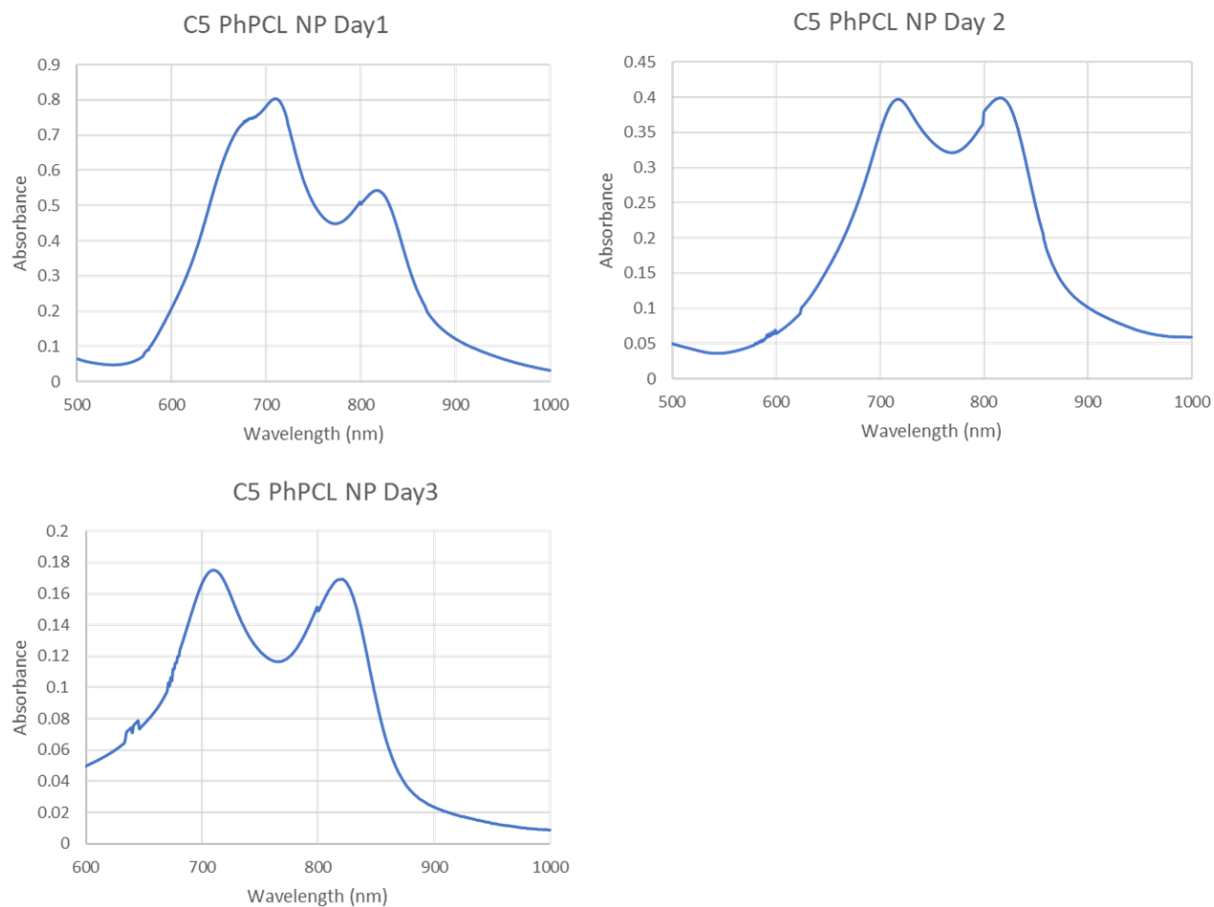

**Figure S23.** Absorption spectra of C5 loaded 10-PhPCL-G3 nanoparticles obtained in different time intervals via nanoprecipitation (NP)

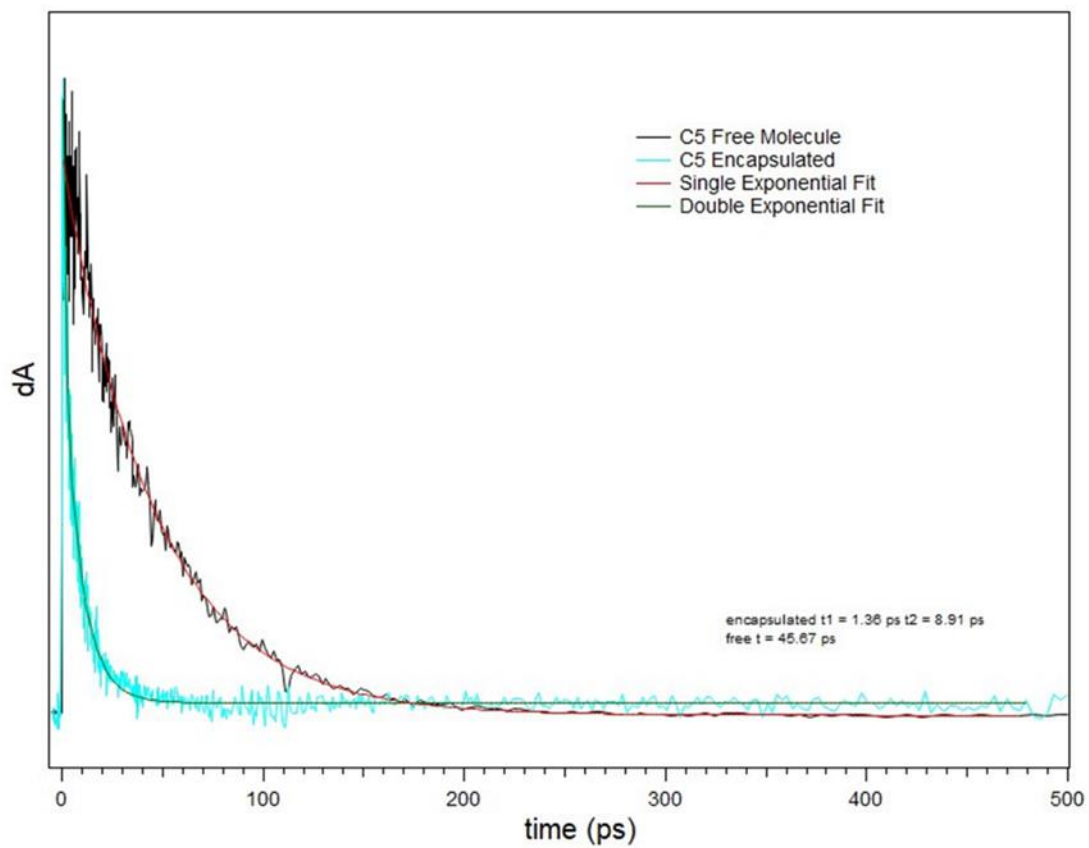

**Figure S24.** Excite state lifetimes for free C5 in the solution and encapsulated in 10-PhPCL-G3 nanoparticles, excitation wavelength 810nm.

## PHOTOTHERMAL DATA

**Table S5.** Photothermal efficiency calculations

| Sample        | $\eta$ | $hA$     | $k_{t\sim}$<br>(s) | $mc_p$<br>(J/K) | $\Delta T_{max}$<br>(K) | $\Delta T_{sol}$<br>(K) | $I$ (J/sec) | $A_\lambda$<br>(estimated) |
|---------------|--------|----------|--------------------|-----------------|-------------------------|-------------------------|-------------|----------------------------|
| C5-<br>PhPCL  | 48.2%  | 0.011119 | 376.43             | 4.1855          | 43.4                    | 2.2                     | 0.95        | 9.555589                   |
| ICG-<br>PhPCL | 45.7%  | 0.010749 | 389.4              | 4.1855          | 42.6                    | 2.2                     | 0.95        | 27.17803                   |

$\eta$ : photothermal efficiency

$h$ : heat transfer coefficient

$A$ : surface area of the container

$k_{t\sim \ln(\frac{\Delta T}{\Delta T_{max}})}$ : slope obtained from the fitting of  $t \sim \ln\left(\frac{\Delta T}{\Delta T_{max}}\right)$  during the naturally cooling

process,  $\Delta T$  is the difference between liquid temperature and room temperature

$\Delta T_{max}$ : the maximum temperature change of the liquid.

$\Delta T_{sol}$ : the maximum temperature change of MilliQ water irradiated by the 808 nm laser

$I$ : irradiation power

$A_\lambda$ : the absorbance of nanoparticles with photothermal agents loaded at 808 nm.

## STORAGE STABILITY

**Table S6.** Storage stability of C5 loaded and empty 10-PhPCL-G3 nanoparticles.

| day | Empty nanoparticles |         | C5 loaded nanoparticles |         |
|-----|---------------------|---------|-------------------------|---------|
|     | PDI                 | Size/nm | PDI                     | Size/nm |
| 1   | 0.436               | 43.22   | 0.022                   | 193.5   |
| 2   | 0.444               | 44.09   | 0.046                   | 205.3   |
| 3   | 0.465               | 50.03   | 0.114                   | 215.6   |
| 4   | 0.589               | 56.99   | 0.066                   | 219.2   |
| 5   | 0.708               | 59.77   | 0.074                   | 230.0   |
| 7   | 0.772               | 61.22   | 0.083                   | 219.8   |
| 9   | 0.446               | 126.8   | 0.053                   | 220.6   |
| 11  | 0.482               | 90.99   | 0.102                   | 214.4   |

## IN VITRO PHOTOTHERMAL EXPERIMENTS

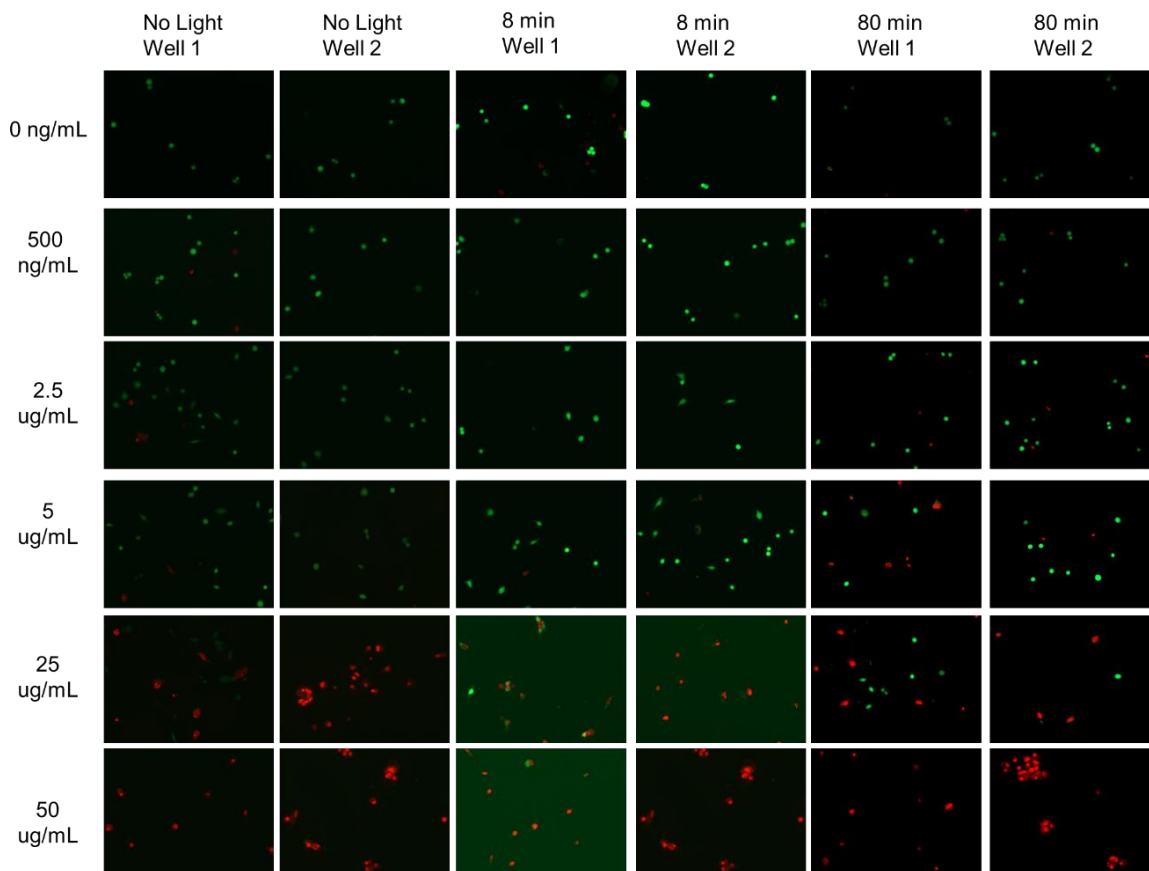

**Figure S25.** Representative trial experiments: cells treated with varying concentrations of the nanoparticle suspension where either irradiated with a 100W red LED lamp for 0, 8, or 80 mins.



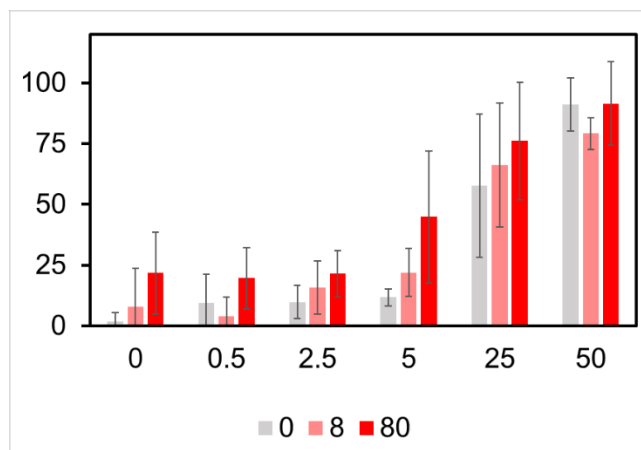

**Figure S26.** Quantified cell death upon irradiation time (x-axis concentration, y-axis dead cell %); cell death % determined as  $100 \times (\text{Red}/(\text{Red}+\text{Green}))$   $n = 4$  technical replicates across 2 independent experiments error bars are SD; 0, 8, 80 = minutes

## REFERENCES

- (1) Chandrasiri, I.; Abebe, D. G.; Loku Yaddehige, M.; Williams, J. S. D.; Zia, M. F.; Dorris, A.; Barker, A.; Simms, B. L.; Parker, A.; Vinjamuri, B. P.; Le, N.; Gayton, J. N.; Chougule, M. B.; Hammer, N. I.; Flynt, A.; Delcamp, J. H.; Watkins, D. L. Self-Assembling PCL–PAMAM Linear Dendritic Block Copolymers (LDBC)s for Bioimaging and Phototherapeutic Applications. *ACS Appl. Bio Mater.* 2020, 3 (9), 5664–5677. <https://doi.org/10.1021/acsabm.0c00432>.
- (2) Peris, G.; Miller, S. J. A Nonenzymatic Acid/Peracid Catalytic Cycle for the Baeyer–Villiger Oxidation. *Org. Lett.* 2008, 10 (14), 3049–3052. <https://doi.org/10.1021/ol8010248>.
